# Supplementary material for: Synthesis, crystal structures, dielectric and magnetic properties of manganese sulfonyldibenzoates
Source: Royal Society of Chemistry journal article supplement (doi:10.1039/d1ce00810b), 2021-01-01
Supplement: d1ce00810b1.pdf [file d1ce00810b1.pdf]

## Synthesis, Crystal Structures, Dielectric, and Magnetic Properties of Manganese-Sulfonyldibenzoate

Balendra,<sup>\*a, b</sup> Bharti Singh,<sup>a</sup> Azeem Bandy,<sup>c</sup> Shailabh Tewari,<sup>a</sup> Vineet Kumar,<sup>a</sup> Sevi Murugavel,<sup>c</sup>, Pattayil Joy<sup>d</sup> and Arunachalam Ramanan<sup>\*a</sup>

<sup>a</sup>*Department of Chemistry, Indian Institute of Technology Delhi, Hauz Khas, New Delhi-110016, India*

<sup>b</sup> Department of Chemistry, Sri Venkateswara College (University of Delhi) Dhaura Kuan Delhi-110021, India

<sup>c</sup>*Department of Physics and Astrophysics, University of Delhi, Delhi-110007, India*

<sup>d</sup>*CSIR-National Chemical Laboratory, Pune, 411008, India*

E-mail: [aramanan@chemistry.iitd.ac.in](mailto:aramanan@chemistry.iitd.ac.in). Tel: +91-11-26591507. Fax: +91-11-26581102.

E-mail: [balendra.iitr@gmail.com](mailto:balendra.iitr@gmail.com).

## Chemistry of Mn-SBA and auxiliary ligand-based system.

Mn(II) is known to form discrete higher nuclear clusters, which act as SBUs in the construction of multidimensional networks. Present work details the formation of new manganese sulfonyl dibenzoate based CPs. The available literature suggested that an additional auxiliary ligand (preferably N-donor ligand) helps to provide phase suitable for single-crystal X-ray crystallography with diverse structural features (Table S1). To understand the Mn-SBA system with auxiliary ligands, we carried out a literature survey based on SBA ligand using CSD database<sup>1</sup> analysis. It showed 323 hits out of which 240 are with transition metals. The lanthanides have 35 hits whereas alkaline-earth metals showed only 30 hits (Fig S1a). By further narrowing the CSD search, we found that only 30 structures are reported with Mn (II), 4,4'-sulfonyldibenzoic acid and different N-donor ligands; interestingly the SBUs in these solids varied from dimer to pentamer (Fig S1b).

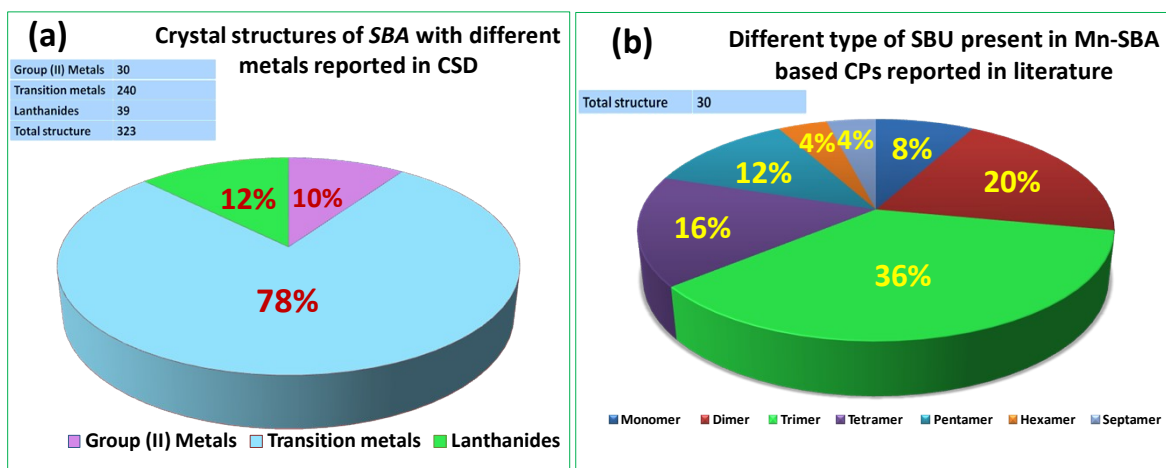

**Fig. S1** (a) Number of solids reported in the database containing SBA and different metal ions. (b) Percentage of different SBU present in the Mn-SBA system reported in the literature.

**Table. S1** Structural diversity of manganese-*SBA*-auxiliary ligand system reported in the literature. The table also includes the six solids prepared in this study for comparison.

| Solids                                                                                                                  | Mn Centre | Geometry of manganese    | Connectivity within the solids                                                                                                                                                                                                                                                                                   | Illustration of the cluster chain in the solids                                                                                                          | Magnetic behaviour                                                                                                                        |
|-------------------------------------------------------------------------------------------------------------------------|-----------|--------------------------|------------------------------------------------------------------------------------------------------------------------------------------------------------------------------------------------------------------------------------------------------------------------------------------------------------------|----------------------------------------------------------------------------------------------------------------------------------------------------------|-------------------------------------------------------------------------------------------------------------------------------------------|
| [Mn( <i>SBA</i> )(2,2-bpy)] <sup>2</sup>                                                                                | Mn(1)     | Distorted Octahedron     | Two distorted octahedra are bridged by the <i>SBA</i> <sup>2-</sup> ligand to form the Mn-O-Mn 1D chain                                                                                                                                                                                                          | 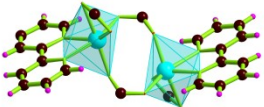<br>[Mn <sub>2</sub> O <sub>8</sub> N <sub>4</sub> ] Dimer            | Not reported                                                                                                                              |
|                                                                                                                         | Mn(2)     | Distorted Octahedron     |                                                                                                                                                                                                                                                                                                                  |                                                                                                                                                          |                                                                                                                                           |
| [Mn( <i>SBA</i> )( <i>phen</i> )(H <sub>2</sub> O)]<br>.2DMA 5                                                          | Mn(1)     | Distorted Octahedron     | Two different polyhedra are connected by the <i>SBA</i> <sup>2-</sup> ligand to form the 2D network.                                                                                                                                                                                                             | <br>[Mn <sub>2</sub> O <sub>7</sub> N <sub>4</sub> ] dinuclear        | Antiferromagnetic<br>$\chi_M T$ per Mn <sub>2</sub> unit at 300K =<br>9.37 emu K mol <sup>-1</sup> Oe <sup>-1</sup><br>$\theta = -9.59$ K |
|                                                                                                                         | Mn(2)     | Distorted square-pyramid |                                                                                                                                                                                                                                                                                                                  |                                                                                                                                                          |                                                                                                                                           |
| [Mn <sub>4</sub> (OH <sub>2</sub> ) <sub>2</sub> ( <i>SBA</i> ) <sub>4</sub> ( <i>bpp</i> ) <sub>4</sub> ] <sup>3</sup> | Mn(1)     | Distorted Octahedron     | Four Mn atoms are bridged by two $\mu_2$ -OH <sub>2</sub> molecules and six carboxylate groups to form a tetranuclear manganese unit as a secondary building unit. Each tetrametallic unit is further interconnected by eight <i>SBA</i> <sup>2-</sup> ligands and six <i>bpp</i> ligands to generate 2D network | <br>[Mn <sub>4</sub> O <sub>16</sub> N <sub>6</sub> ]<br>tetranuclear | Antiferromagnetic<br>$\chi_M T$ per Mn <sub>4</sub> unit at 300K =<br>16.366 cm <sup>3</sup> mol <sup>-1</sup> K<br>$\theta = -15.044$ K  |
|                                                                                                                         | Mn(2)     | Distorted Octahedron     |                                                                                                                                                                                                                                                                                                                  |                                                                                                                                                          |                                                                                                                                           |
| [Mn <sub>2</sub> ( <i>SBA</i> ) <sub>2</sub> ( <i>btb</i> ) <sub>0.5</sub> (H <sub>2</sub> O)] <sup>3</sup>             | Mn(1)     | Distorted square-pyramid | The Mn1 and Mn2 centers are connected by four carboxylate groups of <i>SBA</i> <sup>2-</sup> ligands to form a paddle-wheel shaped dinuclear manganese unit. This dinuclear unit is further connected to another unit to form the 1D quadruple chains.                                                           | <br>[Mn <sub>2</sub> O <sub>9</sub> N <sub>1</sub> ]<br>dinuclear   | Not reported                                                                                                                              |
|                                                                                                                         | Mn(2)     | Distorted square-pyramid |                                                                                                                                                                                                                                                                                                                  |                                                                                                                                                          |                                                                                                                                           |

|                                                                                                                                                               |                         |                                |                                                                                                                                                                                                                                                                                                                                                                                                                                                  |                                                                                                                                                                                               |                                                                                                                                                                                                                                                                                                                                                   |
|---------------------------------------------------------------------------------------------------------------------------------------------------------------|-------------------------|--------------------------------|--------------------------------------------------------------------------------------------------------------------------------------------------------------------------------------------------------------------------------------------------------------------------------------------------------------------------------------------------------------------------------------------------------------------------------------------------|-----------------------------------------------------------------------------------------------------------------------------------------------------------------------------------------------|---------------------------------------------------------------------------------------------------------------------------------------------------------------------------------------------------------------------------------------------------------------------------------------------------------------------------------------------------|
| [Mn <sub>4</sub> (SBA) <sub>4</sub> (bim)(H <sub>2</sub> O) <sub>4</sub> ].2H <sub>2</sub> O <sup>3</sup>                                                     | Mn(1)                   | Distorted octahedron           | Four Mn atoms are bridged by eight carboxylate groups to produce a tetranuclear manganese unit. Two neighboring tetranuclear manganese units are further linked by four SBA <sup>2-</sup> ligands to generate 3D structure                                                                                                                                                                                                                       | 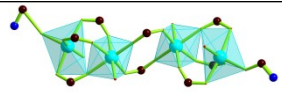<br>[Mn <sub>4</sub> O <sub>18</sub> N <sub>2</sub> ]<br>tetranuclear                                      | Antiferromagnetic<br>χ <sub>M</sub> T per Mn <sub>4</sub> unit at 300K = 16.834 cm <sup>3</sup> mol <sup>-1</sup> K<br>θ = -9.216K                                                                                                                                                                                                                |
|                                                                                                                                                               | Mn(2)                   | Distorted square-pyramid       |                                                                                                                                                                                                                                                                                                                                                                                                                                                  |                                                                                                                                                                                               |                                                                                                                                                                                                                                                                                                                                                   |
| [Mn <sub>5</sub> -(μ <sub>3</sub> -OH) <sub>2</sub> (SBA) <sup>4</sup> (2,2-bpy) <sub>2</sub> (H <sub>2</sub> O) <sub>2</sub> ].H <sub>2</sub> O <sup>4</sup> | Mn(1)<br>Mn(2)<br>Mn(3) | All adopt distorted octahedron | The six coordinated MnI centre is connected to four adjacent Mn centers in a corner- and/or edge sharing mode to form a [Mn <sub>5</sub> (μ <sub>3</sub> -OH) <sub>2</sub> (μ <sub>3</sub> -O) <sub>2</sub> ]. Each pentanuclear manganese cluster is further linked to six others through six triply bridging SBA <sup>2-</sup> and four doubly bridging SBA <sup>2-</sup> ligands to generate a 2D network                                     | <br>[Mn <sub>5</sub> (μ <sub>3</sub> -OH) <sub>2</sub> (μ <sub>3</sub> -O) <sub>2</sub> ].<br>pentanuclear | Antiferromagnetic<br>χ <sub>M</sub> T per Mn <sub>5</sub> unit at 300K = 21.027 cm <sup>3</sup> mol <sup>-1</sup> K<br>θ = -19.119K                                                                                                                                                                                                               |
| [Mn <sub>5</sub> (SBA) <sub>4</sub> (X) <sub>2</sub> (DMA) <sub>4</sub> ].4DMA<br>X=2-pic in <b>1</b><br>X= pyz in <b>3</b><br>X= mpyz in <b>4</b>            | Mn(1)<br>Mn(2)<br>Mn(3) | All adopt distorted octahedron | The pentameric cluster {Mn <sub>5</sub> N <sub>2</sub> O <sub>24</sub> } acting as SBU unit contains three corners shared octahedral polyhedrons as central atom Mn(1) occurred at inversion centered occupying at the special position the other part of the pentameric cluster generated automatically by symmetry. Each Mn <sub>5</sub> SBU units are connected to other four units by the SBA <sup>2-</sup> ligands to form the 2D structure | <br>{Mn <sub>5</sub> N <sub>2</sub> O <sub>24</sub> }<br>pentanuclear                                      | Antiferromagnetic<br>χ <sub>M</sub> T per Mn <sub>5</sub> unit at 300K = 21.75 emu K mol <sup>-1</sup> Oe <sup>-1</sup> ( <b>1</b> ), 22.91 emu K mol <sup>-1</sup> Oe <sup>-1</sup> ( <b>3</b> ), and 20.50 emu K mol <sup>-1</sup> Oe <sup>-1</sup> ( <b>4</b> )<br>θ = -21.01 K ( <b>1</b> ), -32.25 K ( <b>3</b> ), and -25.80 K ( <b>4</b> ) |
| [Mn(SBA)(EtOH)] <sup>5</sup>                                                                                                                                  | Mn(1)                   | Distorted octahedron           | The inorganic motif displays 1D chain, formed by the corner-sharing MnO <sub>6</sub> polyhedra. These chains are linked together by the SBA <sup>2-</sup> ligands in two directions to generate the 2D network.                                                                                                                                                                                                                                  | <br>[MnO <sub>6</sub> ] extended mononuclear                                                             | Not reported                                                                                                                                                                                                                                                                                                                                      |

|                                                                                                                                  |                |                                 |                                                                                                                                                                                                                                                                                                       |                                                                                                                                              |                                                                                                                                               |
|----------------------------------------------------------------------------------------------------------------------------------|----------------|---------------------------------|-------------------------------------------------------------------------------------------------------------------------------------------------------------------------------------------------------------------------------------------------------------------------------------------------------|----------------------------------------------------------------------------------------------------------------------------------------------|-----------------------------------------------------------------------------------------------------------------------------------------------|
| $[\text{Mn}(\text{SBA})(\text{H}_2\text{O})]_5^5$                                                                                | Mn(1)          | Distorted octahedron            | The inorganic 1D chains, which are formed by the edge-sharing $\text{Mn}_2\text{O}_{10}$ that are connected by $\text{SBA}^{2-}$ ligand units. These chains are further linked together by the $\mu_5$ -links of $\text{SBA}^{2-}$ ligands in two directions to generate the 2D structure             | 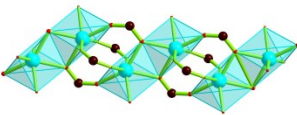<br>[ $\text{Mn}_2\text{O}_{10}$ ] dinuclear              | Not reported                                                                                                                                  |
| $[\text{Mn}(\text{SBA})(\text{phen})_2(\text{H}_2\text{O})] \cdot 3\text{H}_2\text{O}^6$                                         | Mn(1)          | Distorted octahedron            | Complex 1 is an isolated-molecule, where carboxylic groups of $\text{SBA}^{2-}$ ligand are deprotonated and provides an oxygen atom to bond to the Mn(II) center,                                                                                                                                     | <br>[ $\text{MnO}_6$ ] discrete monomer                   | Not reported                                                                                                                                  |
| $[\text{Mn}_2(\text{SBA})_2(\text{H}_2\text{O})(\text{py})_4]_6$                                                                 | Mn(1)<br>Mn(2) | Both adopt distorted octahedron | $\text{H}_2\text{O}$ links the Mn(1) and Mn(2) to a binuclear metal unit, where $\text{SBA}$ extend it 3D network                                                                                                                                                                                     | <br>[ $\text{Mn}_2\text{O}_8\text{N}_4$ ] dinuclear       | Antiferromagnetic<br>$\chi_M T$ per $\text{Mn}_2$ unit at 300K = $8.60 \text{ cm}^3 \text{ mol}^{-1} \text{ K}$<br>$\theta = -18.9\text{K}$   |
| $[\text{Mn}_3(\text{SBA})_2(\text{HSBA})_2(2, 2\text{-bipy})_2]_6$                                                               | Mn(1)<br>Mn(2) | Both adopt distorted octahedron | $\text{SBA}^{2-}$ ligands link the tri-nuclear SBUs into 1D chain with the other kind of $\text{SBA}^{2-}$ ligands stretching out along the c direction. The two protonated carboxylic groups link to each other through two pairs of hydrogen bonding which extend the 1D chain to the 2D structure. | <br>[ $\text{Mn}_3\text{O}_{12}\text{N}_3$ ] trinuclear  | Antiferromagnetic<br>$\chi_M T$ per $\text{Mn}_3$ unit at 300K = $12.78 \text{ cm}^3 \text{ mol}^{-1} \text{ K}$<br>$\theta = -2.14\text{K}$  |
| $[\text{Mn}_3(\text{SBA})_2(\text{pyz})_2(\text{DMF})(\text{H}_2\text{O})] \cdot \text{DMF} \cdot \text{H}_2\text{O} \mathbf{2}$ | Mn(1)          | Distorted pentagonal bipyramid  | The trimeric $\{\text{Mn}_3\text{N}_2\text{O}_{14}\}$ SBU unit contains two edges shared polyhedron, as central atom Mn(1) occurred at inversion centered occupying at the special position which gives rise to a trimer through symmetry translation. The                                            | <br>[ $\text{Mn}_3\text{N}_2\text{O}_{14}$ ] trinuclear | Antiferromagnetic<br>$\chi_M T$ per $\text{Mn}_3$ unit at 300K = $13.80 \text{ emu K mol}^{-1} \text{ Oe}^{-1}$ ,<br>$\theta = -7.07\text{K}$ |

|                                                                                                        |                         |                                |                                                                                                                                                                                        |                                                                                       |                                                                                                                                                                                                                                        |
|--------------------------------------------------------------------------------------------------------|-------------------------|--------------------------------|----------------------------------------------------------------------------------------------------------------------------------------------------------------------------------------|---------------------------------------------------------------------------------------|----------------------------------------------------------------------------------------------------------------------------------------------------------------------------------------------------------------------------------------|
|                                                                                                        | Mn(2)                   | Distorted octahedron           | continuous chain of trimeric units are bridged by the $SBA^{2-}$ ligand forming a 2D structure                                                                                         |                                                                                       |                                                                                                                                                                                                                                        |
| $[Mn_3(SBA)_3(phen)_2] \cdot 5D$<br>MF 6                                                               | Mn(1)<br>Mn(2)<br>Mn(3) | All adopt distorted octahedron | The trimeric SBU $\{Mn_3N_2O_{14}\}$ unit contains three corners shared polyhedron. The continuous chain of trimeric units is bridged by the $SBA^{2-}$ ligand forming a 2D structure. | 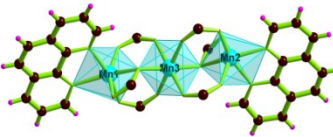   | Antiferromagnetic<br>$\chi_M T$ per $Mn_3$ unit at 300K =<br>12.13 emu K mol <sup>-1</sup> Oe <sup>-1</sup> ,<br>$\theta = -15.74$ K                                                                                                   |
| $[Mn_4(SBA)_4(4-mepy)_2$<br>$(H_2O)_4] \cdot 2H_2O^6$                                                  | Mn(1)                   | Distorted octahedron           | Solid contains a tetra-nuclear Mn(II) cluster SBU unit which is extended by the $SBA^{2-}$ ligand to form the 1D network                                                               |    | Antiferromagnetic<br>$\chi_M T$ per $Mn_4$ unit at 300K =<br>14.90 cm <sup>3</sup> mol <sup>-1</sup> K<br>$\theta = -8.6218$ K                                                                                                         |
|                                                                                                        | Mn(2)                   | Distorted square-pyramid       |                                                                                                                                                                                        |                                                                                       |                                                                                                                                                                                                                                        |
| $[Mn_4(SBA)_4(bpp)_4(1-H_2O)_2] \cdot 0.5H_2O^6$                                                       | Mn(1)<br>Mn(2)          | Distorted octahedron           | Solid adopts a 2D structure with tetra-nuclear Mn(II) cluster SBU unit extended by the $SBA^{2-}$ ligand to form the 2D network                                                        |    | Antiferromagnetic<br>$\chi_M T$ per $Mn_4$ unit at 300K =<br>12.49 cm <sup>3</sup> mol <sup>-1</sup> K<br>$\theta = -23.08$ K                                                                                                          |
| $[Mn_5(SBA)_4(HSBA)_2] \cdot 4$<br>$\cdot 5H_2O^7$<br>and<br>$[Mn_5(NH_4)_2(SBA)] \cdot 2H_2$<br>$O^7$ | Mn(1)<br>Mn(2)          | Distorted octahedron           | Distorted square pyramidal Mn is edge shared with octahedral Mn forming a trimer connected further by carboxylate oxygens with two other square pyramidal Mn to form the pentamer.     |  | Antiferromagnetic<br>$\chi_M T$ per $Mn_5$ unit at 300K =<br>16.83 emu mol <sup>-1</sup> K<br>$\theta = -138.9$ K<br>Antiferromagnetic<br>$\chi_M T$ per $Mn_5$ unit at 300K =<br>14.94 emu mol <sup>-1</sup> K<br>$\theta = -210.1$ K |
|                                                                                                        | Mn(3)                   | Distorted square-pyramid       |                                                                                                                                                                                        |                                                                                       |                                                                                                                                                                                                                                        |

|                                                                                                                                              |                         |                                |                                                                                                                                                                                                                                                                                                                                                                                                              |                                                                                                                                                       |                                                                                                                                   |
|----------------------------------------------------------------------------------------------------------------------------------------------|-------------------------|--------------------------------|--------------------------------------------------------------------------------------------------------------------------------------------------------------------------------------------------------------------------------------------------------------------------------------------------------------------------------------------------------------------------------------------------------------|-------------------------------------------------------------------------------------------------------------------------------------------------------|-----------------------------------------------------------------------------------------------------------------------------------|
| $[\text{Mn}_4(\text{SBA})_4(\text{DMA})_2] \cdot 3 \text{DMA}^8$                                                                             | Mn(1)<br>Mn(2)<br>Mn(3) | All adopt distorted octahedron | The $\text{Mn}^{2+}$ ions are bonded through the carboxylate oxygens and the $\mu_2$ -O of the DMA molecules forming infinite Mn–O–Mn chains. The chains can be considered to be formed from trimeric $[\text{Mn}_3(\text{CO}_2)_6]$ units [Mn(1), Mn(2), and Mn(3)] connected by Mn(4) octahedra.                                                                                                           | 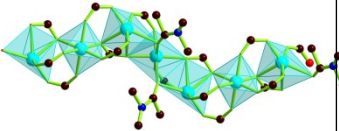<br>[ $\text{Mn}_3\text{O}_{12}$ ] trinuclear                      | Antiferromagnetic<br>$\chi_M T$ per $\text{Mn}_4$ unit at 300K = 17.4 $\text{emu mol}^{-1} \text{K}$<br>$\theta = -26.7\text{K}$  |
| $[\text{Mn}_3(\text{SBA})_3(\text{DMA})_2(\text{X})] \cdot \text{DMA}$ . X=MeOH, EtOH, $\text{CH}_3\text{CN}$ , ethylene glycol <sup>8</sup> | Mn(1)<br>Mn(2)          | Distorted octahedron           | The $\text{Mn}^{2+}$ ions form trimeric unit $[\text{Mn}_3(\text{CO}_2)_6]$ . This trimer unit can be considered to be the secondary building unit for this structure. The connectivity between the trimer units and the $\text{SBA}^{2-}$ anions initially forms a two-dimensional layer which is further bonded through $\text{SBA}^{2-}$ anions leading to the formation of a three-dimensional structure | <br>[ $\text{Mn}_3\text{O}_{12}$ ] trinuclear                      | Antiferromagnetic<br>$\chi_M T$ per $\text{Mn}_3$ unit at 300K = 14.1 $\text{emu mol}^{-1} \text{K}$<br>$\theta = -41.2\text{K}$  |
|                                                                                                                                              | Mn(3)                   | Distorted square-pyramid       |                                                                                                                                                                                                                                                                                                                                                                                                              |                                                                                                                                                       |                                                                                                                                   |
| $[\text{Mn}(\text{SBA})(\text{dpap})] \cdot 1.5\text{H}_2\text{O}^9$                                                                         | Mn(1)<br>Mn(2)          | Distorted octahedron           | Two polyhedra $\text{MnO}_6$ are bridged by the $\text{SBA}^{2-}$ ligand and N-based donor to form the 3D structure                                                                                                                                                                                                                                                                                          | <br>[ $\text{MnO}_6$ ] discrete mononuclear                        | Not reported                                                                                                                      |
| $[\text{H}_3\text{O}][\text{Mn}_3(\mu_3\text{-OH})(\text{SBA})_3(\text{H}_2\text{O})] \cdot (\text{DMF})_5^{10}$                             | Mn(1)<br>Mn(2)<br>Mn(3) | All adopt distorted octahedron | The $\text{Mn}^{2+}$ ions are connected via the $\mu_3$ -OH as well as through the six carboxylate groups to form a triangular $[\text{Mn}_3(\mu_3\text{-OH})(\text{CO}_2)_6]$ unit, which gives rise to a hexamer $[\text{Mn}_6(\mu_3\text{-OH})_2(\text{CO}_2)_{12}]$ through symmetry translation. The $\text{Mn}_6$ clusters are connected through pairs of $\text{SBA}^{2-}$ anions forming a 2D layer  | <br>[ $\text{Mn}_6(\text{OH})_2(\text{CO}_2)_{12}$ ] hexanuclear | Antiferromagnetic<br>$\chi_M T$ per $\text{Mn}_3$ unit at 300K = 18.6 $\text{emu mol}^{-1} \text{K}$<br>$\theta = -107.1\text{K}$ |



|                                                                                                                                         |                                  |                                |                                                                                                                                                                                                                                                                                                                                                           |                                                                                                                                                             |                                                                                                                                          |
|-----------------------------------------------------------------------------------------------------------------------------------------|----------------------------------|--------------------------------|-----------------------------------------------------------------------------------------------------------------------------------------------------------------------------------------------------------------------------------------------------------------------------------------------------------------------------------------------------------|-------------------------------------------------------------------------------------------------------------------------------------------------------------|------------------------------------------------------------------------------------------------------------------------------------------|
| $[\text{H}_3\text{O}]_2[\text{Mn}_7(\text{OH})_4(\text{SBA})_6(\text{H}_2\text{O})_4](\text{H}_2\text{O})_2(\text{DMF})_8^{10}$         | Mn(1)<br>Mn(2)<br>Mn(3)<br>Mn(4) | All adopt distorted octahedron | In solid a one-dimensional chain results from the connectivity between Mn7 clusters and $\text{SBA}^{2-}$ anions. Two such chains are oriented in a direction that is mutually perpendicular to each other, forming the 2D layers. The layers are cross-linked by $\text{SBA}^{2-}$ ions, giving rise to an anionic three-dimensional structure.          | 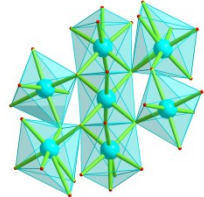<br>$[\text{Mn}_7(\mu_3\text{-OH})_4(\text{CO}_2)_{12}]$<br>septanuclear | Antiferromagnetic<br>$\chi_M T$ per $\text{Mn}_{3.5}$ unit at 300K = $16.4 \text{ emu mol}^{-1} \text{ K}$<br>$\theta = -54.1 \text{ K}$ |
| $[\text{Mn}_3(\text{SBA})(\text{bibp})(\text{NO}_2^-)_2(\text{H}_2\text{O})_2] \cdot 2\text{DMF}^{11}$                                  | Mn(1)<br>Mn(2)<br>Mn(3)          | Distorted octahedron           | Three neighboring Mn (II) ions are connected by four carboxylate groups from four different $\text{SBA}^{2-}$ ligands and two O atoms from two nitrite ions to form a linear trinuclear building block. The adjacent trinuclear building blocks are connected by ligands BIBP and $\text{SBA}^{2-}$ to form an intriguing 3D network.                     | <br>$[\text{Mn}_3\text{O}_{12}\text{N}_4]$ trinuclear                    | Antiferromagnetic<br>$\chi_M T$ per $\text{Mn}_3$ unit at 300K = $12.61 \text{ cm}^3 \text{ mol}^{-1} \text{ K}$                         |
| $(\text{Me}_2\text{NH}_2)[\text{Mn}_4(\text{SBA})_4(\text{HSBA})(\text{H}_2\text{O})] \cdot 3\text{H}_2\text{O} \cdot 2\text{DMF}^{12}$ | Mn(1)<br>Mn(2)<br>Mn(3)<br>Mn(4) | Distorted octahedron           | In this solid $\text{Mn}1\text{O}_6$ , $\text{Mn}2\text{O}_6$ , $\text{Mn}3\text{O}_6$ , and $\text{Mn}4\text{O}_6$ polyhedra are connected in other one by one via corner-sharing oxygen atoms to generate a Mn1-Mn2-Mn3-Mn4 unit. These infinite chains are then cross-linked by $\text{SBA}^{2-}$ and $\text{HSBA}^-$ ligands to create a 3D framework | <br>$[\text{Mn}_4\text{O}_{20}]$ tetranuclear                           | Antiferromagnetic<br>$\chi_M T$ per $\text{Mn}_4$ unit at 300K = $16.96 \text{ emu mol}^{-1} \text{ K}$<br>$\theta = -8.55 \text{ K}$    |

<sup>a</sup>Abbreviations used: *SBA*, 4,4'-sulphonyldibenzoic acid (the ligand is also referred as *sda* and *sdba* in the literature); 2,2-*bpy*, 2,2-bipyridine; *phen*, 1,10-phenanthroline; *bpp/dpap*, 1,3-bis(4-pyridyl) propane; *btb*, 1,4-bis(1,2,4-triazol-1-yl)butane; *bim*, 1,4-bis(imidazol-1-yl)butane; *py*, pyridine; 4-*mepy*, 4-picoline; *bpp*, 1,3-bi(pyridine-4-yl)propane; *bibp*, 4,4'-bisimidazolylbiphenyl



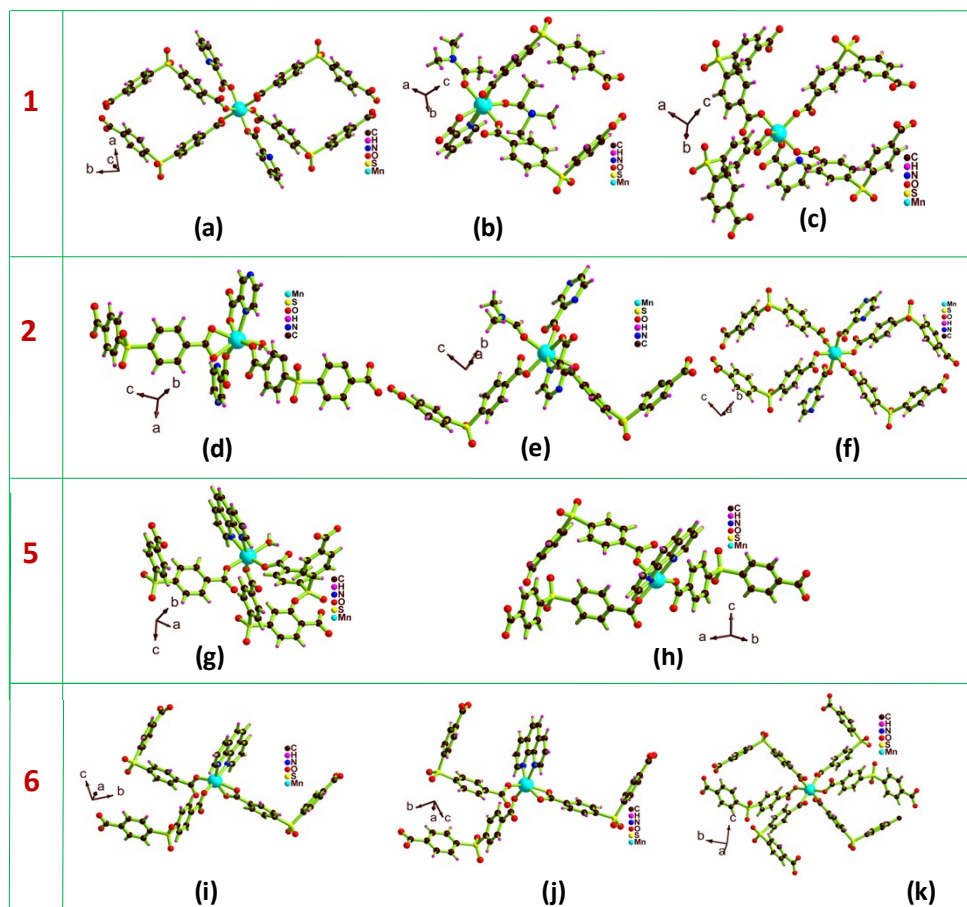

**Fig. S2** Coordination environment of Mn(II) in 1-6

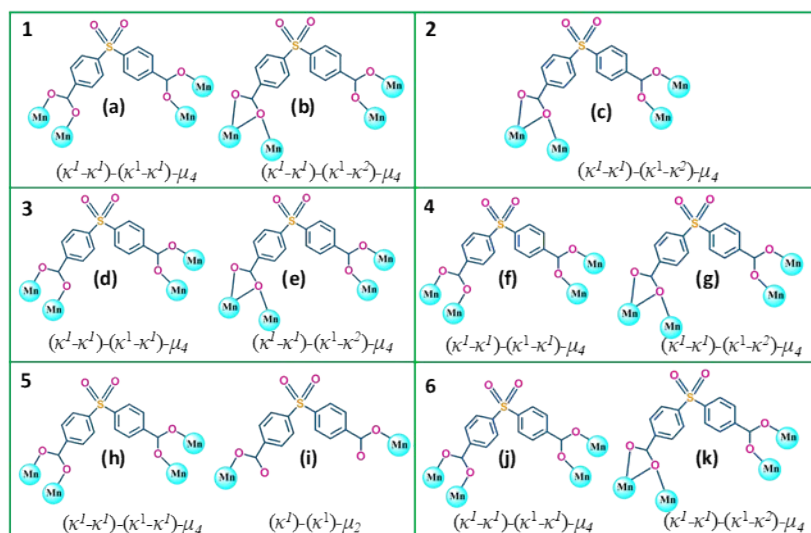

**Fig. S3** Coordination modes of *SBA* with Mn(II) in 1-6

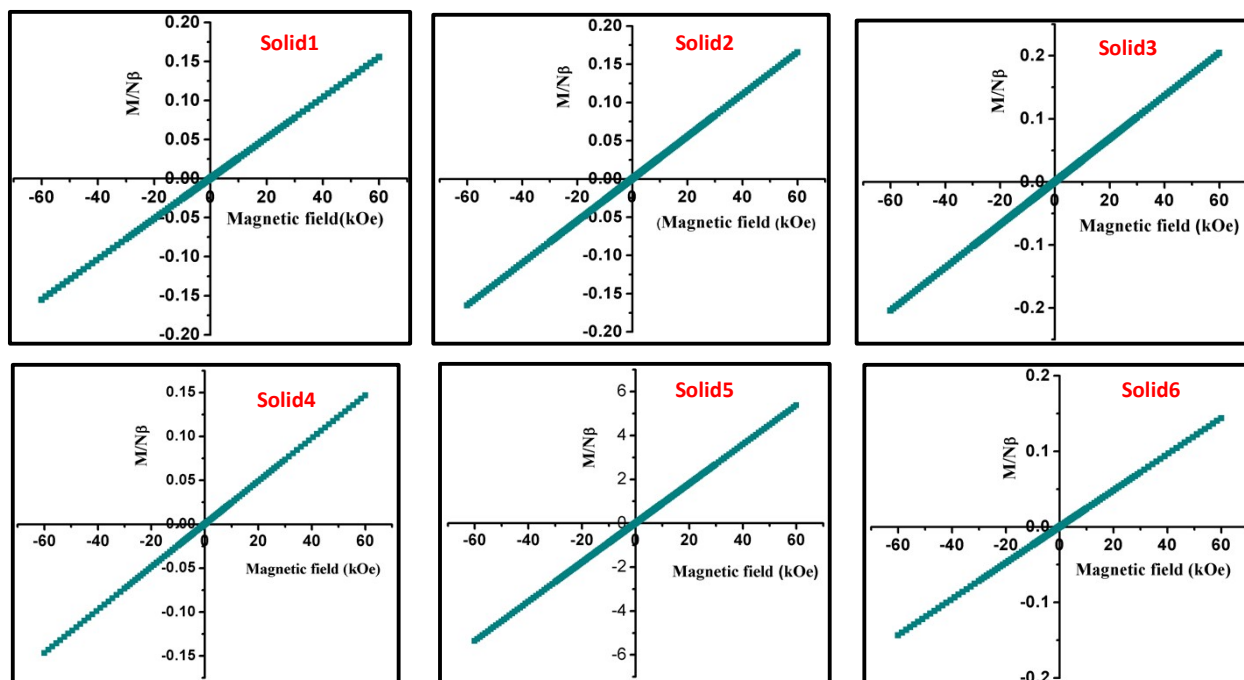

Fig S4. Field-dependent magnetization curve for 1-6 at 300K

Table S2 Selected bond lengths (Å) and angles (°) for 1-6

| 1                     |            |                                          |            |            |            |
|-----------------------|------------|------------------------------------------|------------|------------|------------|
| O9—Mn3                | 2.273(9)   | O8 <sup>iv</sup> —Mn1—O10                | 88.91(25)  | O1—Mn2—O2  | 86.55(26)  |
| O11—Mn1               | 2.231(7)   | O8—Mn1—O10                               | 91.09(25)  | O4—Mn2—O5  | 85.89(30)  |
| O11—Mn3               | 2.320(9)   | O10 <sup>iv</sup> —Mn1—O10               | 179.99(23) | O1—Mn2—O5  | 102.46(26) |
| O3—Mn3                | 2.203(8)   | O8 <sup>iv</sup> —Mn1—O11                | 89.54(21)  | O2—Mn2—O5  | 169.33(26) |
| O3—Mn2                | 2.221(9)   | O8—Mn1—O11                               | 90.46(21)  | O4—Mn2—O3  | 105.92(27) |
| O10—Mn1               | 2.166(6)   | O10 <sup>iv</sup> —Mn1—O11               | 91.58(21)  | O1—Mn2—O3  | 157.30(25) |
| O4—Mn2                | 2.13(1)    | O10—Mn1—O11                              | 88.42(21)  | O2—Mn2—O3  | 85.51(24)  |
| O12—Mn3               | 2.148(9)   | O8 <sup>iv</sup> —Mn1—O11 <sup>iv</sup>  | 90.46(21)  | O5—Mn2—O3  | 88.09(24)  |
| O6—Mn3                | 2.084(9)   | O8—Mn1—O11 <sup>iv</sup>                 | 89.54(21)  | O4—Mn2—N1  | 174.20(29) |
| O2—Mn2                | 2.163(8)   | O10 <sup>iv</sup> —Mn1—O11 <sup>iv</sup> | 88.42(21)  | O12—Mn3—O3 | 85.75(24)  |
| O1—Mn2                | 2.139(8)   | O10—Mn1—O11 <sup>iv</sup>                | 91.58(21)  | O6—Mn3—O9  | 99.12(32)  |
| O5—Mn2                | 2.201(9)   | O11—Mn1—O11 <sup>iv</sup>                | 180.0(2)   | O7—Mn3—O9  | 94.43(24)  |
| O7—Mn3                | 2.129(9)   | O4—Mn2—O1                                | 94.96(33)  | O12—Mn3—O9 | 89.64(26)  |
| O8—Mn1                | 2.118(7)   | O4—Mn2—O2                                | 87.67(30)  | O3—Mn3—O9  | 155.49(24) |
| Mn1—O8 <sup>iv</sup>  | 2.118(7)   | O8 <sup>iv</sup> —Mn1—O8                 | 180.00(23) | O6—Mn3—O11 | 155.78(27) |
| Mn1—O10 <sup>iv</sup> | 2.166(6)   | O8 <sup>iv</sup> —Mn1—O10 <sup>iv</sup>  | 91.09(25)  | O7—Mn3—O3  | 91.67(22)  |
| Mn1—O11 <sup>iv</sup> | 2.231(7)   | O8—Mn1—O10 <sup>iv</sup>                 | 88.91(25)  | O5—Mn2—N1  | 88.40(26)  |
| Mn1—O11—Mn3           | 107.59(23) | O1—Mn2—N1                                | 87.30(27)  | O3—Mn2—N1  | 72.78(24)  |

|                                                                                                                    |            |              |            |                 |            |
|--------------------------------------------------------------------------------------------------------------------|------------|--------------|------------|-----------------|------------|
| Mn3—O3—Mn2                                                                                                         | 106.83(24) | O2—Mn2—N1    | 97.81(27)  | O6—Mn3—O7       | 88.1(3)    |
| O7—Mn3—O12                                                                                                         | 175.05(25) | O6—Mn3—O3    | 104.80(27) | O6—Mn3—O12      | 88.48(32)  |
| <b>Symmetry codes:</b> (i) x, 1+y, z; (ii) 2-x, 1-y, -z; (iii) x, -1+y, z; (iv) 1-x, 1-y, 1-z                      |            |              |            |                 |            |
| <b>2</b>                                                                                                           |            |              |            |                 |            |
| Mn1—O8                                                                                                             | 2.277(3)   | O8—Mn1—N3i   | 142.75(6)  | Mn3—O2          | 2.135(7)   |
| Mn1—O4i                                                                                                            | 2.272(4)   | O4i—Mn1—O8   | 71.73(6)   | Mn3—O5          | 2.142(5)   |
| Mn1—O7                                                                                                             | 2.155(5)   | O4i—Mn1—N3i  | 71.24(6)   | Mn3—O3          | 2.153(5)   |
| Mn1—O9                                                                                                             | 2.216(2)   | O7—Mn1—O8    | 133.86(6)  | Mn3—O6          | 2.094(7)   |
| Mn1—N3i                                                                                                            | 2.324(6)   | O7—Mn1—O4i   | 150.42(7)  | O8ii—Mn2—N1ii   | 71.76(6)   |
| Mn2—O8ii                                                                                                           | 2.256(3)   | O7—Mn1—O9    | 85.97(7)   | O4—Mn2—N1ii     | 143.35(6)  |
| Mn2—O4                                                                                                             | 2.262(3)   | O9—Mn1—O8    | 81.01(7)   | O1—Mn2—O8ii     | 147.77(6)  |
| Mn2—O1                                                                                                             | 2.190(5)   | O9—Mn1—O4i   | 84.24(7)   | O1—Mn2—O4       | 137.39(6)  |
| Mn2—O20                                                                                                            | 2.211(3)   | O8ii—Mn2—O4  | 72.31(6)   | O1—Mn2—O20      | 85.36(7)   |
| <b>Symmetry codes:</b> (i) -x, 2-y, 1-z; (ii) 1-x, 2-y, 1-z; (iii) 0.5-x, -0.5+y, 1.5-z; (iv) 0.5-x, 0.5+y, 1.5-z. |            |              |            |                 |            |
| <b>Solid 3</b>                                                                                                     |            |              |            |                 |            |
| O1—Mn1                                                                                                             | 2.123(4)   | O16—Mn1i     | 2.189(4)   | O5—Mn2—O2       | 175.08(12) |
| O2—Mn2                                                                                                             | 2.149(5)   | O16—Mn2i     | 2.290(5)   | O5—Mn2—O4       | 85.02(11)  |
| O3—Mn1                                                                                                             | 2.155(3)   | O15—Mn2i     | 2.292(5)   | O5—Mn2—O16ii    | 88.65(10)  |
| O4—Mn2                                                                                                             | 2.212(4)   | O11—Mn3      | 2.177(4)   | O5—Mn2—O15ii    | 90.42(11)  |
| O5—Mn2                                                                                                             | 2.113(5)   | O2—Mn2—O4    | 91.15(10)  | O16ii—Mn2—C9ii  | 29.0(1)    |
| O9—Mn3                                                                                                             | 2.123(4)   | O2—Mn2—O16ii | 94.94(10)  | O16ii—Mn2—O15ii | 57.23(10)  |
| O12—Mn3                                                                                                            | 2.146(4)   | O2—Mn2—O15ii | 94.35(11)  | O15ii—Mn2—C9ii  | 28.23(11)  |
| O1—Mn1—O3                                                                                                          | 92.65(9)   | O4—Mn2—C9ii  | 127.03(10) | O9—Mn3—O12      | 95.64(13)  |
| O1—Mn1—O16ii                                                                                                       | 91.43(10)  | O4—Mn2—O16ii | 98.10(9)   | O9—Mn3—O11      | 86.04(11)  |
| O3—Mn1—O16ii                                                                                                       | 88.83(9)   | O4—Mn2—O15ii | 155.07(10) | O12—Mn3—O11     | 104.68(12) |
| O2—Mn2—C9ii                                                                                                        | 95.12(11)  | O5—Mn2—C9ii  | 89.66(11)  |                 |            |
| <b>Symmetry codes:</b> (i) x, -1+y, z; (ii) x, 1+y, z.                                                             |            |              |            |                 |            |
| <b>4</b>                                                                                                           |            |              |            |                 |            |
| Mn3—O3                                                                                                             | 2.155(4)   | Mn2—O11i     | 2.238(7)   | O1—Mn2—O00A     | 86.54(17)  |
| Mn3—O10i                                                                                                           | 2.205(6)   | Mn2—O1       | 2.108(8)   | O1—Mn2—O11i     | 100.97(17) |
| Mn3—O18                                                                                                            | 2.129(7)   | Mn1—O5       | 2.129(6)   | O5—Mn1—O6       | 99.42(16)  |
| Mn2—O10i                                                                                                           | 2.342(10)  | Mn1—O6       | 2.183(8)   | O2—Mn1—O5       | 97.60(16)  |
| Mn2—O3                                                                                                             | 2.129(8)   | Mn1—O2       | 2.118(7)   | O18—Mn3—O10i    | 91.73(15)  |
| O11i—Mn2—O10i                                                                                                      | 56.85(14)  | O3—Mn3—O10i  | 93.12(13)  | O5—Mn2—O10i     | 91.25(14)  |
| O1—Mn2—O10i                                                                                                        | 157.56(15) | O18—Mn3—O3   | 89.48(14)  | O6—Mn2—O11i     | 93.59(15)  |
| Mn3ii—O10—Mn2ii                                                                                                    | 109.29(14) |              |            |                 |            |
| <b>Symmetry codes:</b> (i) x, -1+y, z; (ii) x, 1+y, z.                                                             |            |              |            |                 |            |
| <b>5</b>                                                                                                           |            |              |            |                 |            |
| O1—Mn1                                                                                                             | 2.186(8)   | O10—Mn2      | 2.063(7)   | O3—Mn1—O2       | 90.86(10)  |
| O2—Mn1                                                                                                             | 2.173(5)   | O8—Mn2       | 2.099(5)   | O3—Mn1—O4       | 93.40(9)   |
| O3—Mn1                                                                                                             | 2.122(7)   | O2—Mn1—O1    | 88.8(1)    | O4—Mn1—O1       | 89.04(9)   |
| O7—Mn2                                                                                                             | 2.079(6)   | O2—Mn1—O4    | 114.29(9)  | O10—Mn2—O7      | 107.67(11) |
| O4—Mn1                                                                                                             | 2.18(1)    | O3—Mn1—O1    | 177.45(10) |                 |            |
| <b>Symmetry codes:</b><br>(i) x, -1+y, z; (ii) -1+x, y, z; (iii) 1+x, y, z; (iv) x, 1+y, z.                        |            |              |            |                 |            |

## 6

|                                                                                             |          |           |           |           |            |
|---------------------------------------------------------------------------------------------|----------|-----------|-----------|-----------|------------|
| Mn1—O6                                                                                      | 2.154(2) | Mn2—O7    | 2.065(3)  | O3—Mn1—O6 | 179.28(9)  |
| Mn1—O3                                                                                      | 2.143(2) | Mn3—O4    | 2.089(3)  | O3—Mn1—O2 | 90.89(11)  |
| Mn1—O2                                                                                      | 2.191(3) | Mn3—O1    | 2.082(3)  | O3—Mn1—O5 | 89.84(11)  |
| Mn1—O5                                                                                      | 2.203(3) | O6—Mn1—O2 | 89.65(11) | O2—Mn1—O5 | 178.59(10) |
| Mn2—O8                                                                                      | 2.099(3) | O6—Mn1—O5 | 89.62(11) | O7—Mn2—O8 | 91.85(13)  |
| (i) -x, 2-y, 1-z; (ii) 1-x, 2-y, 1-z; (iii) 0.5-x, -0.5+y, 1.5-z; (iv) 0.5-x, 0.5+y, 1.5-z. |          |           |           |           |            |

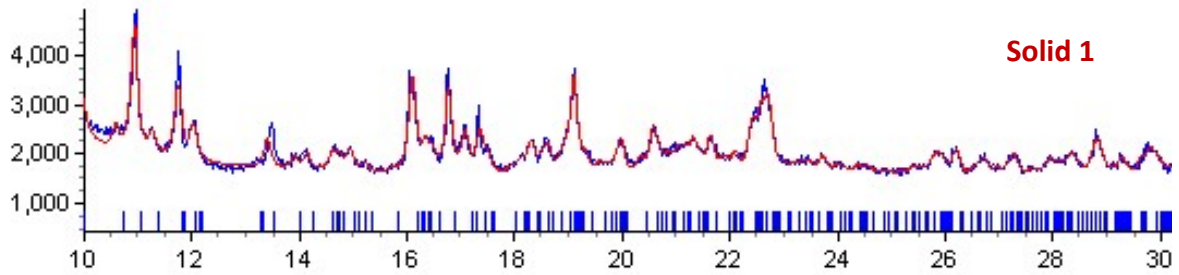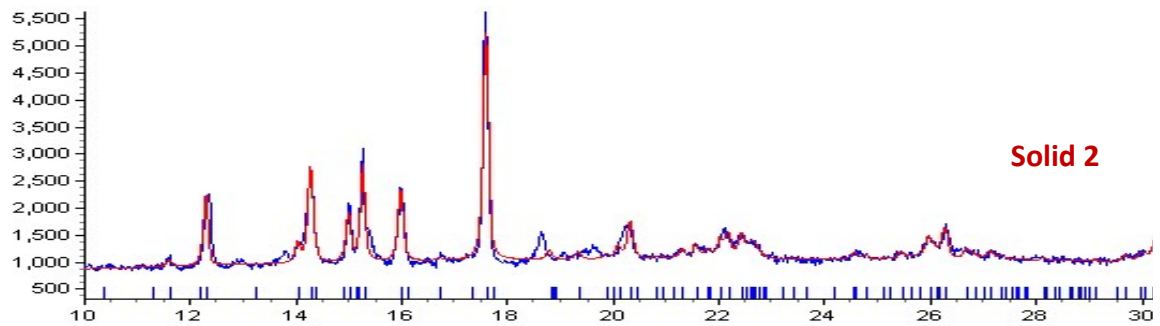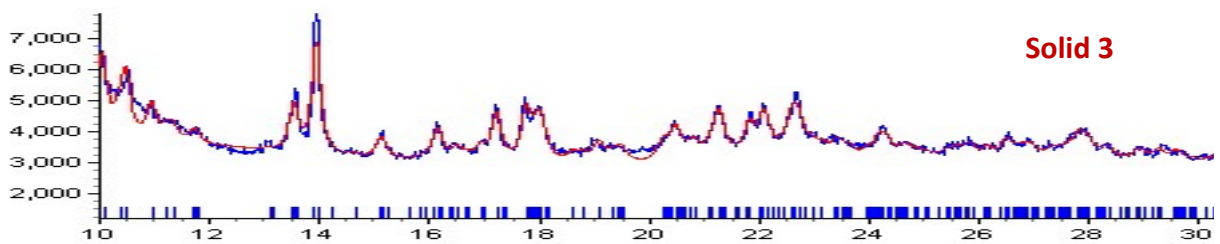

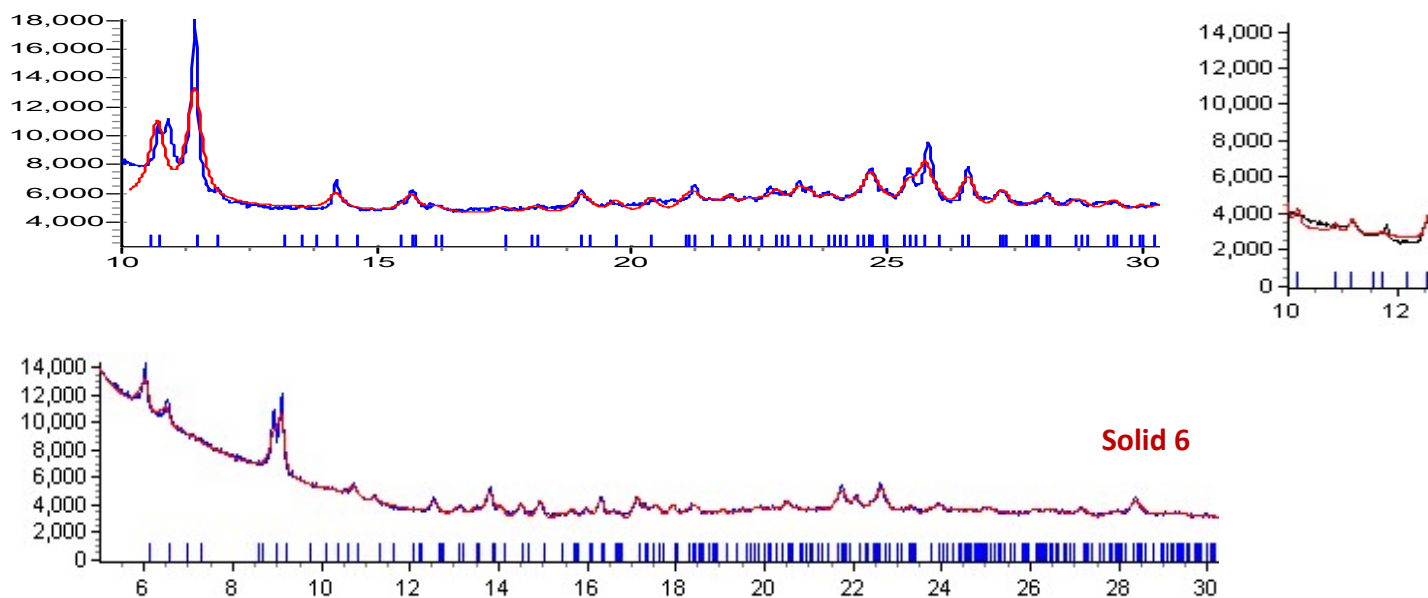

**Fig S5:** Rietveld refinement plots for **1-6**, indicating the homogeneity of the bulk samples. The plot shows the experimental powder XRD profile (blue line), the calculated (red line), and blue tick lines on the bottom show Bragg positions. Footnote: \*Peak(s) marked with star correspond to an unidentified phase.

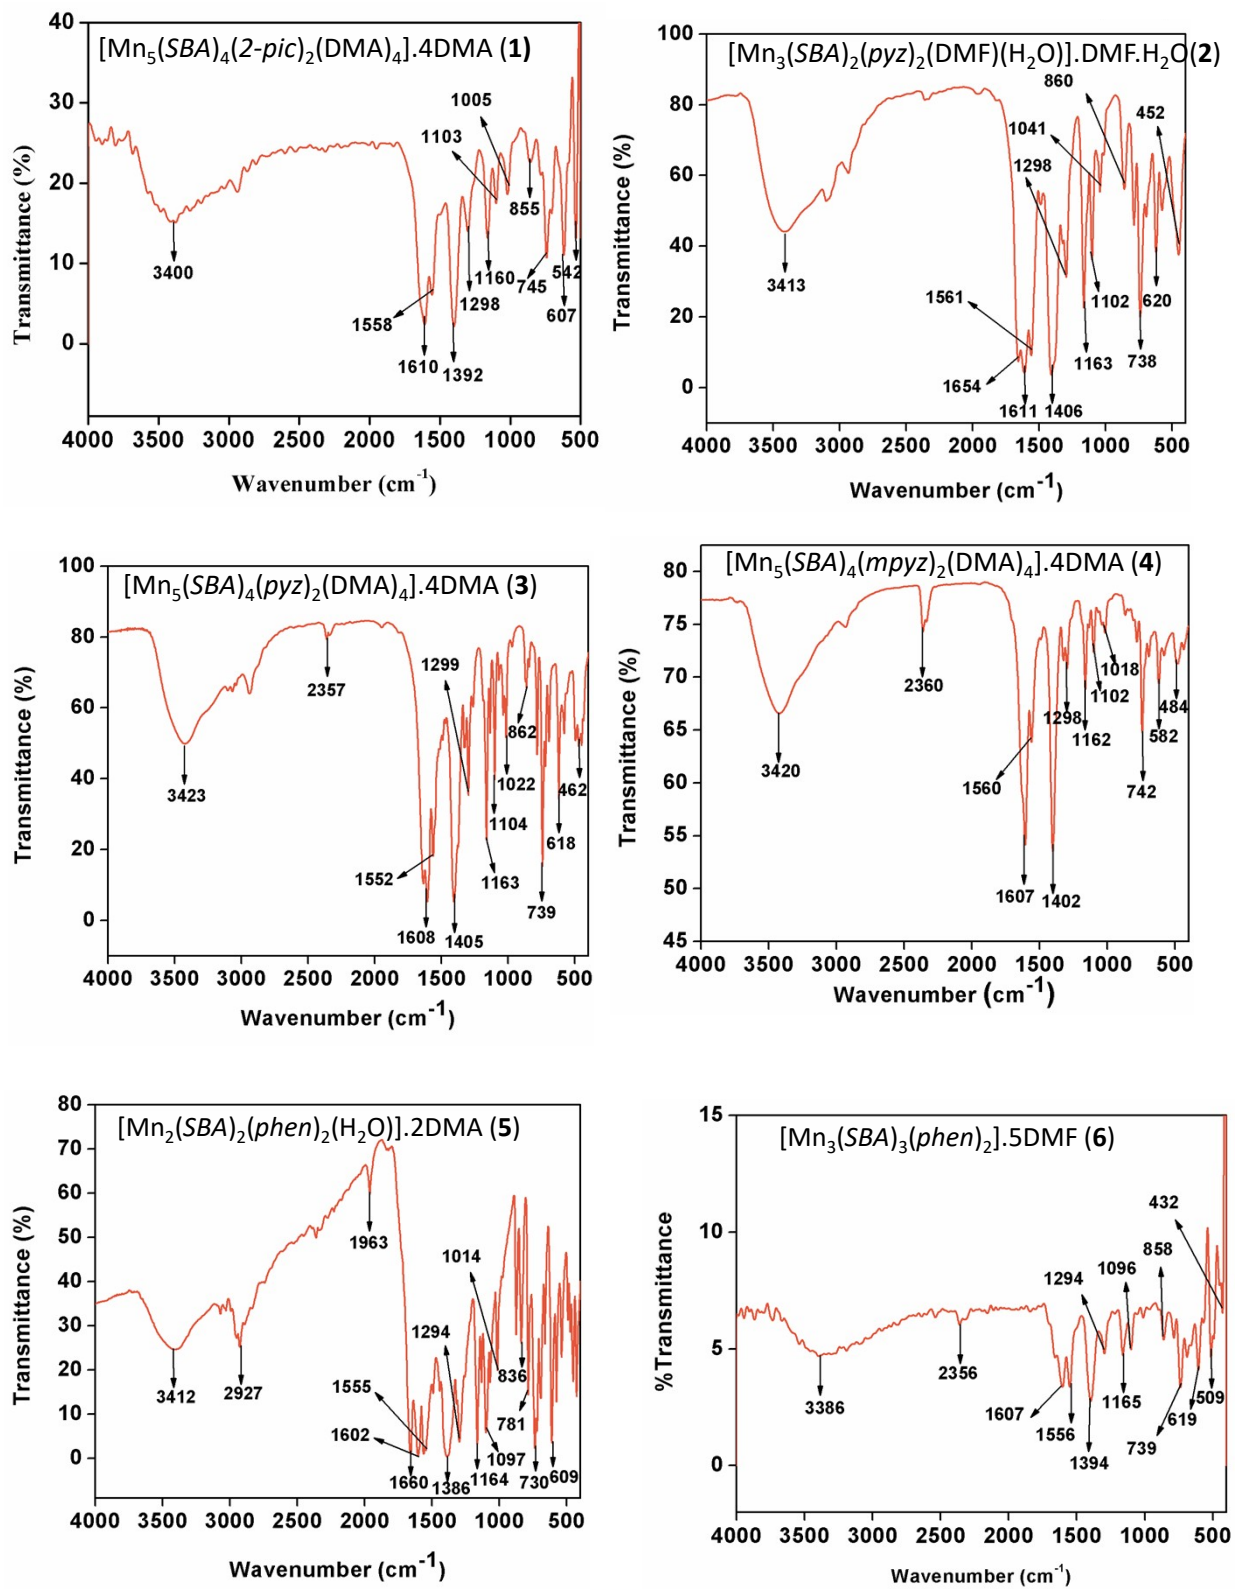

Fig S6: FT-IR spectra of 1-6

**Table S3:** Selected vibrational frequencies for **1-6**

|                 | <b>1</b>              | <b>2</b> | <b>3</b> | <b>4</b> | <b>5</b> | <b>6</b> |
|-----------------|-----------------------|----------|----------|----------|----------|----------|
|                 | $\nu(\text{cm}^{-1})$ |          |          |          |          |          |
| Mn-O stretch    | 542                   | 452      | 462      | 484      | 490      | 509      |
| C-S stretch     | 607                   | 620      | 618      | 582      | 609      | 619      |
| Mn-O-Mn Bending | 745                   | 738      | 739      | 742      | 730      | 739      |
| S=O stretch     | 1005                  | 1041     | 1022     | 1018     | 1014     | 1096     |
| C-O stretch     | 1160                  | 1163     | 1163     | 1162     | 1164     | 1165     |
| C-N (solvent)   | 1298                  | 1298     | 1299     | 1298     | 1294     | 1294     |
| C=C (aromatic)  | 1558                  | 1561     | 1552     | 1560     | 1555     | 1556     |
| C=O (solvent)   | 1610                  | 1611     | 1608     | 1607     | 1602     | 1607     |
| -OH stretch     | 3400                  | 3413     | 3423     | 3420     | 3412     | 3386     |

The vibrational spectra of **1-6** are quite comparable owing to the similarity in nature of bonds in these solids. Since all the six solids contain SBA in their structure, the peaks common among them are listed in Table S3. All solids displayed broad peak from 3400-3200  $\text{cm}^{-1}$  corresponding to O-H stretching. Peaks from 1600-1620 $\text{cm}^{-1}$  depict the symmetric stretch of carboxylate while the peaks around 1560-1551 $\text{cm}^{-1}$  result from the asymmetric stretch of carbonyl group. Multiple sharp peaks ranging from 1600-1475 $\text{cm}^{-1}$  are from symmetric and antisymmetric stretch of C=C which is at lower end compared to isolated C=C depicting a partial single bond owing to resonance in the ring. Multiple Peaks from 1350 $\text{cm}^{-1}$  to 1000 $\text{cm}^{-1}$  are from the symmetric C-O and C-N bonds. Presence of peaks near 790 $\text{cm}^{-1}$  and 840 $\text{cm}^{-1}$  indicate the para-substitution of phenyl rings. The stretching peaks near 745-710 $\text{cm}^{-1}$  depict the presence of Mn-O-Mn bond. The stretching peaks near 800-600 $\text{cm}^{-1}$  and around 1010  $\text{cm}^{-1}$  depicts the presence of C-S and S=O bonds, respectively. Mn-O symmetric stretch appears near 540-450 $\text{cm}^{-1}$ .



## References:

- 1 C. R. Groom, I. J. Bruno, M. P. Lightfoot and S. C. Ward, *Acta Crystallogr. Sect. B Struct. Sci. Cryst. Eng. Mater.*, 2016, **72**, 171–179.
- 2 S.-W. Yan, G.-J. Zhang, H.-Y. Chen, S.-C. Chang and F.-T. Zhang, *Acta Crystallogr. Sect. E Struct. Rep. Online*, 2011, **67**, m712–m712.
- 3 H. Chen, D. Xiao, J. He, Z. Li, G. Zhang, D. Sun, R. Yuan, E. Wang and Q.-L. Luo, *CrystEngComm*, 2011, **13**, 4988.
- 4 D. Xiao, R. Yuan, Y. Chai and E. Wang, *Eur. J. Inorg. Chem.*, 2008, **2008**, 2610–2615.
- 5 C.-Y. Wu, D. S. Raja, C.-C. Yang, C.-T. Yeh, Y.-R. Chen, C.-Y. Li, B.-T. Ko and C.-H. Lin, *CrystEngComm*, 2014, **16**, 9308–9319.
- 6 N. Li, L. Chen, F. Lian, F. Jiang and M. Hong, *Inorganica Chim. Acta*, 2010, **363**, 3291–3301.
- 7 S. Bhattacharya, K. V. Ramanujachary, S. E. Lofland, T. Magdaleno and S. Natarajan, *CrystEngComm*, 2012, **14**, 4323.
- 8 S. Bhattacharya, A. J. Bhattacharyya and S. Natarajan, *Inorg. Chem.*, 2015, **54**, 1254–1271.
- 9 C.-J. Wang, Y.-Y. Wang, J.-Q. Liu, H. Wang, Q.-Z. Shi and S.-M. Peng, *Inorganica Chim. Acta*, 2009, **362**, 543–550.
- 10 S. Bhattacharya, M. Gnanavel, A. J. Bhattacharyya and S. Natarajan, *Cryst. Growth Des.*, 2014, **14**, 310–325.
- 11 C.-L. Zhang, L. Qin and H.-G. Zheng, *Inorg. Chem. Commun.*, 2013, **34**, 34–36.
- 12 C.-B. Tian, C. He, Y.-H. Han, Q. Wei, Q.-P. Li, P. Lin and S.-W. Du, *Inorg. Chem.*, 2015, **54**, 2560–2571.
